## 1                    **Early temporal dynamics of cellular responses to SARS-CoV-2**

2    Arinjay Banerjee<sup>1,2</sup>, Patrick Budykowski<sup>3</sup>, Daniel Richard<sup>4</sup>, Hassaan Maan<sup>5,6</sup>, Jennifer A.  
3    Aguiar<sup>7</sup>, Nader El-Sayes<sup>2</sup>, Michael R. D’Agostino<sup>2</sup>, Benjamin J.-M. Tremblay<sup>7</sup>, Sam Afkhami<sup>2</sup>,  
4    Mehran Karimzadeh<sup>5,6,8</sup>, Lily Yip<sup>9</sup>, Mario Ostrowski<sup>10</sup>, Jeremy A. Hirota<sup>2,11</sup>, Robert Kozak<sup>9,12</sup>,  
5    Terence D. Capellini<sup>4</sup>, Matthew S. Miller<sup>2,13</sup>, Andrew G. McArthur<sup>2,13</sup>, Bo Wang<sup>5,6,8</sup>, Andrew C.  
6    Doxey<sup>7,11</sup>, Samira Mubareka<sup>9,12</sup> and Karen Mossman<sup>1,2,\*</sup>

7

8    <sup>1</sup>Department of Pathology and Molecular Medicine, McMaster University; Hamilton, ON,  
9    Canada.

10   <sup>2</sup>Michael G. DeGroote Institute for Infectious Disease Research, McMaster University;  
11   Hamilton, ON, Canada.

12   <sup>3</sup>Institute of Medical Science, University of Toronto, Toronto, ON, Canada

13   <sup>4</sup>Department of Human Evolutionary Biology, Harvard University, Cambridge, MA, USA.

14   <sup>5</sup>Vector Institute for Artificial Intelligence, Toronto, ON, Canada

15   <sup>6</sup>Peter Munk Cardiac Centre, University Health Network, Toronto, ON, Canada.

16   <sup>7</sup>Department of Biology, University of Waterloo; Waterloo, Ontario, N2L 3G1; Canada

17   <sup>8</sup>Department of Medical Biophysics, University of Toronto, ON, Canada

18   <sup>9</sup>Sunnybrook Research Institute, Toronto, ON, Canada

19   <sup>10</sup>Department of Medicine, University of Toronto, Toronto, ON, Canada

20   <sup>11</sup>Division of Respiriology, Department of Medicine, McMaster University, Hamilton, ON,  
21   Canada.

22   <sup>12</sup>Department of Laboratory Medicine and Pathobiology, University of Toronto, Toronto, ON,  
23   Canada.

24 <sup>13</sup>Department of Biochemistry and Biomedical Sciences, McMaster University, Hamilton, ON,  
25 Canada.

26

27

28 \*Corresponding author:

29 Dr. Karen Mossman

30 **Email:** [mossk@mcmaster.ca](mailto:mossk@mcmaster.ca)

31 **Classification:** Biological Sciences; Microbiology

32 **Keywords:** SARS-CoV-2, transcription, interferon, ISGs, coronavirus

33 **Author contributions:** A.B., D.R., H.M., A.G.M. and J.A.A. designed the study; A.B., P.B.,  
34 N.E.-S., M.R.D., S.A. and L.Y. performed research; A.B., D.R., H.M., J.A.A, N.E.-S., B.J.-M.T.,  
35 and M.K. analyzed the data; J.A.H. and M.S.M. provided reagents; A.B., M.O., J.A.H., R.K.,  
36 T.C., M.S.M., A.G.M, A.C.D., S.M. and K.M. provided funding and supervised the study; A.B.,  
37 D.R., H.M., N.E.-S., J.A.A. and A.G.M. wrote the manuscript. All authors reviewed the  
38 manuscript.

39

40

41

42

43

44

45

## 46 **Abstract**

47 Two highly pathogenic human coronaviruses that cause severe acute respiratory syndrome  
48 (SARS) and Middle East respiratory syndrome (MERS) have evolved proteins that can inhibit  
49 host antiviral responses, likely contributing to disease progression and high case-fatality rates.  
50 SARS-CoV-2 emerged in December 2019 resulting in a global pandemic. Recent studies have  
51 shown that SARS-CoV-2 is unable to induce a robust type I interferon (IFN) response in human  
52 cells, leading to speculation about the ability of SARS-CoV-2 to inhibit innate antiviral  
53 responses. However, innate antiviral responses are dynamic in nature and gene expression levels  
54 rapidly change within minutes to hours. In this study, we have performed a time series RNA-seq  
55 and selective immunoblot analysis of SARS-CoV-2 infected lung (Calu-3) cells to characterize  
56 early virus-host processes. SARS-CoV-2 infection upregulated transcripts for type I IFNs and  
57 interferon stimulated genes (ISGs) after 12 hours. Furthermore, we analyzed the ability of  
58 SARS-CoV-2 to inhibit type I IFN production and downstream antiviral signaling in human  
59 cells. Using exogenous stimuli, we discovered that SARS-CoV-2 is unable to modulate *IFN $\beta$*   
60 production and downstream expression of ISGs, such as *IRF7* and *IFIT1*. Thus, data from our  
61 study indicate that SARS-CoV-2 may have evolved additional mechanisms, such as masking of  
62 viral nucleic acid sensing by host cells to mount a dampened innate antiviral response. Further  
63 studies are required to fully identify the range of immune-modulatory strategies of SARS-CoV-  
64 2.

## 65 **Significance**

66 Highly pathogenic coronaviruses that cause SARS and MERS have evolved proteins to  
67 shutdown antiviral responses. The emergence and rapid spread of SARS-CoV-2, along with its  
68 relatively low case-fatality rate have led to speculation about its ability to modulate antiviral

69 responses. We show that SARS-CoV-2 is unable to block antiviral responses that are mounted by  
70 exogenous stimuli. Data from our study provide promising support for the use of recombinant  
71 type I IFN as combination therapy to treat COVID-19 patients. Furthermore, our data also  
72 suggest that the inability of SARS-CoV-2 to efficiently modulate antiviral responses may be  
73 associated with its low case-fatality rate compared to other pathogenic CoVs that cause SARS  
74 and MERS.

## 75 **Main Text**

### 76 **Introduction**

77 Severe acute respiratory syndrome coronavirus 2 (SARS-CoV-2) emerged in December  
78 2019 to cause a global pandemic of coronavirus disease 2019 (COVID-19) (1). SARS-CoV-2  
79 causes a respiratory infection with acute respiratory distress syndrome (ARDS) in severe cases.  
80 Innate antiviral responses, which include type I interferons (IFNs) are the first line of defense  
81 after a virus enters a cell (2). Cellular pattern recognition receptors (PRRs) recognize viral  
82 nucleic acids and activate key cellular kinases, such as inhibitor of nuclear factor kappa-B kinase  
83 subunit epsilon (IKK $\epsilon$ ) and TANK-binding kinase 1 (TBK1). These kinases activate  
84 transcription factors, such as interferon regulatory factor 3 (IRF3) to stimulate downstream  
85 production of type I IFNs (3).

86 To counteract host antiviral responses, viruses encode proteins that can modulate type I  
87 IFN production and signaling (4, 5). Emerging pathogenic human coronaviruses, such as SARS-  
88 CoV and Middle East respiratory syndrome (MERS)-CoV have evolved multiple proteins that  
89 can inhibit type I IFN responses in human cells (6-10). Thus, to better understand SARS-CoV-2  
90 pathogenesis, it is critical to identify the early dynamic interactions of SARS-CoV-2 and the type  
91 I IFN response.

92 Data from *in vitro* and *in vivo* work have demonstrated the lack of induction of type I IFN  
93 responses following SARS-CoV-2 infection (11). Interestingly, on the contrary, emerging data  
94 from patients with mild and moderate cases of COVID-19 have demonstrated the presence of  
95 type I IFN (12, 13). Thus, the inability to mount an effective IFN response to SARS-CoV-2 may  
96 also be associated with underlying host factors, along with the duration and extent of viral  
97 infection. Furthermore, it is unclear if SARS-CoV-2 is unable to stimulate a type I IFN response  
98 or actively suppresses the response after initiating it in infected cells.

99 In this study, we have identified global early transcriptional responses that are initiated  
100 during SARS-CoV-2 infection of human lung epithelial (Calu-3) cells at 0, 1, 2, 3, 6, and 12  
101 hours post infection. SARS-CoV-2 infected cells mounted a type I IFN response between 6 and  
102 12 hours post infection (hpi) and the degree of this response correlated with virus replication and  
103 transcription. However, a high dose infection of SARS-CoV-2 is unable to modulate poly (I:C)-  
104 induced IFN $\beta$  production and signaling. Furthermore, SARS-CoV-2 is unable to modulate  
105 interferon stimulated gene (ISG) expression in response to exogenous IFN $\beta$ . Our study provides  
106 insights into early host responses that are generated on infection with SARS-CoV-2 and the  
107 inability of the virus to efficiently modulate these responses, which may explain the low case-  
108 fatality rate of COVID-19. Furthermore, it is likely that comorbidities and deficiencies in type I  
109 IFN responses are associated with severe outcomes in COVID-19 patients. In summary, our data  
110 indicate that SARS-CoV-2 is inefficient in modulating type I IFN production and signaling when  
111 cells are exogenously stimulated. Further investigations into the ability of SARS-CoV-2 to mask  
112 its nucleic acid pathogen associated molecular pattern (PAMP) from cellular PRRs to generate a  
113 dampened innate antiviral response is warranted.

## 114 **Results**

115 **SARS-CoV-2 replication proceeds in a directional manner.** The replication cycle of CoVs is  
116 complex and involves the generation of sub-genomic RNA molecules, which in turn code for  
117 mRNA that are translated into proteins (14, 15). To determine SARS-CoV-2 replication kinetics  
118 in human cells using RNA-seq, we infected human lung epithelial cells (Calu-3) at a multiplicity  
119 of infection (MOI) of 2. One hour post incubation, virus inoculum was replaced with cell growth  
120 media and the clock was set to zero hours. We extracted and sequenced poly-A enriched RNA at  
121 0, 1, 2, 3, 6 and 12 hours post infection (hpi). SARS-CoV-2 genome, sub-genomic RNA and  
122 transcripts were detected in infected samples; viral transcript expression clustered based on post-  
123 infection time using PCA (*SI Appendix*, Fig. S1). From our RNA-seq analysis, we were able to  
124 detect high levels of expression of SARS-CoV-2 structural and accessory genes at the 3' end of  
125 the genome as early as 0 hpi (Fig. 1A). Significant expression of *ORF1ab*, relative to 0 hpi was  
126 detected at 6 hpi (Fig. 1A). SARS-CoV-2 nucleocapsid (*N*) gene was highly expressed relative to  
127 other genes as early as 0 hpi (Fig 1B), with relative expression significantly increasing over time  
128 ( $p = 1.4e-16$ ). The absolute expression of other genes increased over time with levels of  $N > M >$   
129  $ORF10 > S > ORF1ab > ORF7a > ORF8 > ORF3a > ORF6 > E > ORF7b > ORF1a$  at 12 hpi  
130 (Fig. 1B; *SI Appendix*, Table S1).

131

132 **SARS-CoV-2 induces a mild type I IFN response.** We analyzed the early host response  
133 mounted by Calu-3 cells that were infected with SARS-CoV-2. Gene expression levels in these  
134 cells clustered based on time-points via PCA (*SI Appendix*, Fig. S2). One hundred and twenty-  
135 four genes were significantly (FDR-adjusted  $p < 0.05$ ) differentially expressed in infected cells,  
136 relative to mock infected cells in at least one time point post infection (absolute  $\log_2$  fold-change  
137  $> 1$ ) (Fig. 1D; *SI Appendix*, Table S2 and Fig. S3). The extent of antiviral gene expression at 12

138 hpi correlated with an increase in viral transcripts (*SI Appendix*, Fig. S3). Interestingly, at early  
139 time points of 2 and 3 hpi, pathway enrichment analysis revealed numerous cellular processes  
140 that were significantly downregulated in SARS-CoV-2 infected cells, relative to mock infected  
141 cells (FDR-adjusted  $p < 0.05$ ). These processes included RNA splicing, apoptosis, ATP  
142 synthesis, and viral and host translation, while genes associated with viral processes, cell  
143 adhesion and double-stranded RNA binding were upregulated in infected cells relative to mock  
144 infected cells (Fig. 1C and *SI Appendix*, Figs. S4 and S5, Table S3). Cellular pathways associated  
145 with type I IFN production and signaling, along with OAS/TRAF-mediated antiviral responses  
146 were upregulated at 12 hpi (Figs. 1C and 1D). Consistent with other reports, transcript levels for  
147 *IFN $\beta$ 1* and *IFN $\lambda$ 1* were significantly upregulated at 12 hpi with SARS-CoV-2 at a high MOI of 2  
148 (Fig. 1E) (11). Transcript levels of *IFN $\lambda$ 2* and *IFN $\lambda$ 3* also increased at 6 and 12 hpi, but the  
149 levels did not reach significance relative to mock infected cells at these time points (Fig. 1E). At  
150 least 19 well-studied antiviral ISGs were upregulated in infected cells, relative to mock infected  
151 cells at 12 hpi, including interferon induced protein with tetratricopeptide repeats 1 (*IFIT1*),  
152 interferon regulatory factor 7 (*IRF7*), 2'-5'-oligoadenylate synthetase 2 (*OAS2*) and MX dynamin  
153 GTPase 1 (*MX1*) (Fig. 1F and *SI Appendix*, Fig. S6 and Table S2). Genes associated with  
154 structural molecule activity, cell adhesion and exocytosis were downregulated in SARS-CoV-2  
155 infected cells, relative to uninfected cells at 12 hpi (*SI Appendix*, Fig. S5).

156

157 **SARS-CoV-2 is unable to modulate type I IFN gene expression induced by an exogenous**  
158 **stimulus.** Coronaviruses, such as those that cause SARS and MERS have evolved multiple  
159 proteins that can modulate type I IFN expression (7-10, 16, 17). To confirm that SARS-CoV-2  
160 infection is sufficient to induce type I IFN and ISG responses in Calu-3 cells, we infected the

161 cells with SARS-CoV-2 and assessed transcript levels of *IFN $\beta$* , *IRF7* and *IFIT1* by quantitative  
162 polymerase chain reaction (qPCR). *IFN $\beta$*  induction was observed 12 hpi in SARS-CoV-2  
163 infected cells, relative to mock-infected cells (Fig. 2A). Consistent with the upregulation of *IFN $\beta$*   
164 transcripts in SARS-CoV-2 infected cells, transcript levels for ISGs, such as *IRF7* and *IFIT1*  
165 were also upregulated 12 hpi (Figs. 2B and 2C).

166 Next, to identify if SARS-CoV-2 is able to modulate type I IFN responses mounted  
167 against an exogenous stimulus, we infected Calu-3 cells with SARS-CoV-2 for 12 hours at a  
168 MOI of 2 and stimulated these cells with exogenous double-stranded RNA [poly(I:C)] for 6  
169 hours. We measured the levels of *IFN $\beta$*  transcripts in these cells by qPCR. Poly(I:C) transfection  
170 alone induced significantly higher levels of *IFN $\beta$*  transcripts relative to mock transfected cells  
171 (Fig. 2D). Similar to that shown in Fig. 2A, SARS-CoV-2 infection alone also induced high  
172 levels of *IFN $\beta$*  transcripts relative to mock infected cells (Fig. 2D). However, SARS-CoV-2  
173 infection-induced levels of *IFN $\beta$*  transcripts were significantly lower compared to both poly(I:C)  
174 transfected cells and SARS-CoV-2 infected + poly(I:C) transfected cells. Interestingly, there was  
175 no significant difference in *IFN $\beta$*  transcript levels between poly(I:C) transfected and SARS-CoV-  
176 2 infected + poly(I:C) transfected cells (Fig. 2D). In fact, there was an increasing trend in *IFN $\beta$*   
177 transcript levels in SARS-CoV-2 infected + poly(I:C) transfected cells relative to cells that were  
178 transfected with poly(I:C) alone; however, the data were not significant at this time point.

179 To support our observations with *IFN $\beta$*  transcripts in SARS-CoV-2 infected and/or  
180 poly(I:C) transfected cells, we also quantified the levels of ISG transcripts, such as *IRF7* and  
181 *IFIT1* in these cells. Poly(I:C) transfection alone induced significantly higher levels of *IRF7* and  
182 *IFIT1* transcripts relative to mock transfected cells (Figs. 2E and 2F). Similar to that shown in  
183 Figs. 2B and 2C, SARS-CoV-2 alone also induced high levels of *IRF7* and *IFIT1* transcripts



184 relative to mock infected cells (Figs. 2E and 2F). However, SARS-CoV-2 infection-induced  
185 levels of *IRF7* and *IFIT1* transcripts were significantly lower compared to both poly(I:C)  
186 transfected cells and SARS-CoV-2 infected + poly(I:C) transfected cells. Notably, *IRF7* and  
187 *IFIT1* transcript levels in SARS-CoV-2 infected + poly(I:C) transfected cells were significantly  
188 higher than levels in cells that were transfected with poly(I:C) alone (Figs. 2E and 2F).

189 To corroborate our gene expression studies, we repeated our experiments and performed  
190 immunoblots for SARS-CoV-2 N, IFIT1 and glyceraldehyde 3-phosphate dehydrogenase  
191 (GAPDH). Poly(I:C) transfection induced low levels of IFIT1 in Calu-3 cells, while SARS-CoV-  
192 2 infection alone was unable to induce detectable levels of IFIT1 in our immunoblots (Fig. 2G).  
193 SARS-CoV-2 infection + poly(I:C) transfection also induced low, but detectable levels of IFIT1  
194 (Fig. 2G). We confirmed SARS-CoV-2 infection in these cells by detecting N protein in the  
195 samples (Fig. 2G).

196  
197 **SARS-CoV-2 is unable to modulate type I IFN signaling.** SARS-CoV and MERS-CoV  
198 proteins can also modulate downstream IFN signaling to restrict the production of ISGs (6). To  
199 determine if SARS-CoV-2 can modulate type I IFN signaling in response to exogenous IFN $\beta$   
200 treatment, we infected Calu-3 cells for 12 hours at a MOI of 2 and stimulated these cells with  
201 recombinant human IFN $\beta$  for 6 hours. We monitored gene expression levels of *IRF7* and *IFIT1*  
202 in these cells by qPCR. For this assay, we developed and utilized recombinant human IFN $\beta$ 1. To  
203 demonstrate the antiviral efficacy of our recombinant IFN, we pre-treated human fibroblast  
204 (THF) cells with IFN $\beta$ 1, followed by RNA and DNA virus infections. Pre-treatment of THF  
205 cells with IFN $\beta$ 1 inhibited the replication of herpes simplex virus (HSV), vesicular stomatitis  
206 virus (VSV) and H1N1 in a dose-dependent manner (*SI Appendix*, Fig. S7).

207 Exogenous IFN $\beta$  treatment alone significantly upregulated transcript levels of *IRF7* and  
208 *IFIT1* relative to mock treated Calu-3 cells (Figs. 2H and 2I). Consistent with our RNA-seq data,  
209 SARS-CoV-2 infection alone induced significant levels of *IRF7* and *IFIT1* transcripts (Figs. 2H  
210 and 2I). However, SARS-CoV-2 induced *IRF7* and *IFIT1* transcript levels were significantly  
211 lower compared to levels in both IFN $\beta$  treated cells and SARS-CoV-2 infected + IFN $\beta$  treated  
212 cells (Figs. 2H and 2I). Transcript levels of *IRF7* and *IFIT1* in IFN $\beta$  treated cells and SARS-  
213 CoV-2 infected + IFN $\beta$  treated cells were not significantly different (Figs. 2H and 2I).

214 Finally, we repeated the experiments with exogenous IFN $\beta$  treatment and performed  
215 immunoblots to determine if SARS-CoV-2 can modulate type I IFN-mediated upregulation of  
216 IFIT1. Exogenous IFN $\beta$  treatment alone induced a robust expression of IFIT1 (Fig. 2J). SARS-  
217 CoV-2 infection alone was not sufficient for a visible increase in IFIT1 expression in our  
218 immunoblots (Fig. 2J). Interestingly, IFN $\beta$  treatment after 12 hours of high dose infection (MOI  
219 = 2) of SARS-CoV-2 also induced a robust expression of IFIT1 (Fig. 2J). We confirmed SARS-  
220 CoV-2 infection in these cells by detecting N protein (Fig. 2J).

## 221 **Discussion**

222 SARS-CoV-2 emerged in December 2019 and has since caused a global pandemic of COVID-19  
223 (1, 18). Clinical observations and emerging data from *in vitro* and *in vivo* studies have  
224 demonstrated the limited ability of SARS-CoV-2 to induce type I IFNs (11). However, the ability  
225 of SARS-CoV-2 to modulate IFN production and signaling remains unknown. Furthermore, gene  
226 expression kinetics of SARS-CoV-2, along with time-associated host responses have not been  
227 described. In this study, we have identified early virus-host interactions using a time-series  
228 RNA-seq experiment. Consistent with other studies (11), we demonstrate that a high dose of  
229 SARS-CoV-2 induces a type I IFN response; however, our data show that SARS-CoV-2 is

230 unable to modulate cellular type I IFN production and signaling that are mounted in response to  
231 exogenous stimuli.

232 RNA-seq analysis of poly(A)-enriched RNA allowed us to map the progression of SARS-  
233 CoV-2 replication and transcription in Calu-3 cells. As observed with other coronaviruses (19-  
234 21), SARS-CoV-2 replicated and transcribed sub-genomic RNA and mRNA in a directional  
235 manner (Figs. 1A and 1B). SARS-CoV-2 *N* gene was highly expressed as early as 0 hpi. High  
236 MOI of SARS-CoV-2 produced cytopathic effects (CPE) in Calu-3 cells at later time points,  
237 which made it difficult to reliably assess host gene expression relative to unstable levels of  
238 house-keeping genes.

239 Coronaviruses, including highly pathogenic SARS-CoV, MERS-CoV and porcine  
240 epidemic diarrhea virus (PEDV) have evolved proteins that can efficiently modulate type I IFN  
241 responses (7-10, 16, 17, 22, 23). The recently demonstrated inability of SARS-CoV-2 to  
242 stimulate the expression of robust amounts of type I IFNs (11) may be associated with its ability  
243 to mask the detection of viral RNA by cellular PRRs and/or its ability to inactivate cellular  
244 mechanisms involved in type I IFN upregulation. Data from our studies show that SARS-CoV-2  
245 is indeed unable to stimulate high levels of *IFN $\beta$*  transcripts relative to poly(I:C) (Fig. 2D).  
246 However, SARS-CoV-2 is unable to efficiently shutdown poly(I:C)-mediated upregulation of  
247 *IFN $\beta$*  transcripts and downstream ISGs (Figs. 2D-F). In fact, poly(I:C) + SARS-CoV-2 induced  
248 higher levels of ISG transcripts relative to poly(I:C) alone. Thus, our data hint at additional  
249 mechanisms that SARS-CoV-2 may have evolved to mitigate the recognition of viral PAMPs by  
250 cellular PRRs. MERS-CoV protein 4a interferes with RIGI and MDA5-mediated sensing of viral  
251 RNA (7). Murine hepatitis virus (MHV) encodes an endoribonuclease that cleaves poly-uridine  
252 residues in the viral genome, thus limiting the activation of cellular PRRs (24). Endoribonuclease

253 deficient mouse CoVs induce a robust type I IFN response and can only replicate in cells that are  
254 IFN deficient (25, 26). It is possible that SARS-CoV-2 uses a similar strategy to limit the  
255 detection of its nucleic acid by cellular PRRs, thus leading to a dampened antiviral IFN response  
256 in these cells. Future studies will identify the full breadth of strategies deployed by SARS-CoV-2  
257 to modulate innate antiviral responses.

258         A recent study has identified the ability of SARS-CoV-2 to replicate to higher titers in the  
259 upper respiratory tract, including nasal cells (27). Hou *et al.* have shown that high levels of virus  
260 replication in nasal cells is associated with high levels of angiotensin-converting enzyme 2  
261 (ACE2) receptor expression in these cells, relative to cells in the lower respiratory tract (27).  
262 Studies have also shown that rhinovirus (common cold virus) replicates to higher titers in nasal  
263 cells due to diminished temperature-dependent innate antiviral responses in these cells (28).  
264 Thus, the inability of SARS-CoV-2 to induce a robust type I IFN response, coupled with the  
265 dampened ability of nasal cells to potentiate an innate immune response may lead to high levels  
266 of virus replication in the upper respiratory tract, as observed in COVID-19 patients (29).

267         In conclusion, our study demonstrates that SARS-CoV-2 is a weak stimulator of type I  
268 IFN responses in infected human cells, relative to the more potent form of PAMP, poly(I:C).  
269 However, our data suggest that the lack of a robust type I IFN response in SARS-CoV-2 infected  
270 cells is likely due to the inability of the cells to recognize viral PAMPs, such as double-stranded  
271 RNA. The inability of SARS-CoV-2 to modulate downstream IFN responses is promising for the  
272 development of IFN $\beta$  as a treatment or post-exposure prophylactic. Clinical trials for  
273 combination IFN $\beta$  therapy against MERS-CoV are currently ongoing (30). IFN $\beta$ , in combination  
274 with lopinavir-ritonavir and ribavirin has been used with promising results in COVID-19 patients  
275 (31). While it is possible that over-expressing viral proteins may identify interactions that can

276 modulate type I IFN production in human cells, we did not observe these effects when cells were  
277 infected with a high MOI of SARS-CoV-2 and stimulated exogenously. Future studies will shed  
278 more light on the full breadth of immune modulatory capabilities of SARS-CoV-2.

## 279 **Materials and Methods**

280 **Cells and viruses.** Vero E6 cells (African green monkey cells; ATCC, Manassas, VA, USA)

281 were maintained in Dulbecco's modified Eagle's media (DMEM) supplemented with 10% fetal

282 bovine serum (FBS; Sigma-Aldrich), 1x L-Glutamine and Penicillin/Streptomycin (Pen/Strep;

283 Corning, VWR, Mississauga, ON, Canada). Calu-3 cells (human lung adenocarcinoma derived;

284 ATCC) were cultured as previously mentioned (32). THF cells (human telomerase life-extended

285 cells; from Dr. Victor DeFilippis' lab) were cultured as previously mentioned (33). *Drosophila*

286 S2 cells (ThermoFisher Scientific, Waltham, MA, USA) were cultured in Schneider's

287 *Drosophila* medium supplemented with 10% FBS (Sigma-Aldrich) as recommended by the

288 manufacturer and cells were incubated at 28°C. Stocks of genetically engineered vesicular

289 stomatitis virus (VSV-GFP) carrying a green fluorescent protein (GFP) cassette (34) were stored

290 at -80°C. H1N1 (A/Puerto Rico/8/1934 mNeon – 2A-HA) stocks were obtained from Dr.

291 Matthew Miller's laboratory. HSV-GFP stocks were generated and maintained as mentioned

292 previously (35). SARS-CoV-2/SB3 virus stocks were propagated on Vero E6 cells and validated

293 by next generation sequencing (36). Virus stocks were thawed once and used for an experiment.

294 A fresh vial was used for each experiment to avoid repeated freeze-thaws. VSV-GFP, HSV-GFP

295 and H1N1 infections were performed at an MOI of 1. SARS-CoV-2 infections were performed at

296 an MOI of 2. Experiments with SARS-CoV-2 were performed in a BSL3 laboratory and all

297 procedures were approved by institutional biosafety committees at McMaster University and the

298 University of Toronto.

## 299 **RNA-Seq**

300 RNA was isolated from cells using RNeasy Mini kit (Qiagen, Hilden, Germany). Sequencing  
301 was conducted at the McMaster Genomics Facility, Farncombe Institute at McMaster University.  
302 Sample quality was first assessed using a Bioanalyzer (Agilent 2100 Bioanalyzer G2938C,  
303 Aligent RNA 6000 Nano Kit, Agilent; Santa Clara, CA, USA ), then enriched (NEBNext  
304 Poly(A) mRNA Magnetic Isolation Module; NEB, Ipswich, MA, USA). Library preparations  
305 were conducted (NEBNext Ultra II Directional RNA Library Prep Kit; NEB, Ipswich, MA,  
306 USA) and library fragment size distribution was verified (Agilent TapeSection D1000; Agilent,  
307 Santa Clara, CA, USA). Libraries were quantified by qPCR, pooled in equimolar amounts, and  
308 qPCR and fragment size distribution verification was conducted again. Libraries were then  
309 sequenced on an Illumina HiSeq 1500 across 3 HiSeq Rapid v2 flow cells in 6 lanes (Illumina;  
310 San Diego, CA, USA) using a paired-end, 2x50 bp configuration, with onboard cluster  
311 generation averaging 30.8M clusters per replicate (minimum 21.9M, maximum 46.0M).

## 312 **Transcript quantification and differential expression analysis**

313 Sequence read quality was checked with FastQC  
314 (<https://www.bioinformatics.babraham.ac.uk/projects/fastqc/>), with reads subsequently aligned to  
315 the human reference transcriptome (GRCh37.67) obtained from the ENSEMBL database (37) ,  
316 indexed using the ‘index’ function of Salmon (version 0.14.0) (38) with a k-mer size of 31.  
317 Alignment was performed using the Salmon ‘quant’ function with the following parameters: “-l  
318 A --numBootstraps 100 --gcBias --validateMappings”. All other parameters were left to defaults.  
319 Salmon quantification files were imported into R (version 3.6.1) (39) using the tximport library  
320 (version 1.14.0) (40) with the ‘type’ option set to ‘salmon’. Transcript counts were summarized  
321 at the gene-level using the corresponding transcriptome GTF file mappings obtained from

322 ENSEMBL. Count data was subsequently loaded into DESeq2 (version 1.26.0) (41) using the  
323 ‘DESeqDataSetFromTximport’ function. In order to determine time/treatment dependent  
324 expression of genes, count data was normalized using the ‘estimateSizeFactors’ function using  
325 the default ‘median ratio method’ and output using the ‘counts’ function with the ‘normalized’  
326 option.

327 For subsequent differential-expression analysis, a low-count filter was applied prior to  
328 normalization, wherein a gene must have had a count greater than 5 in at least three samples in  
329 order to be retained. Using all samples, this resulted in the removal of 12,980 genes for a final set  
330 of 15,760 used. Principal Component Analysis (PCA) of samples across genes was performed  
331 using the ‘vst’ function in DESeq2 (default settings) and was subsequently plotted with the  
332 ggplot2 package in R (42). Differential expression analyses were carried out with three designs:  
333 (a) the difference between infection/control status across all timepoints, (b) considering the  
334 effects of post-infection time (i.e. the interaction term between time and infection status) and (c)  
335 the difference between infection/control status at individual timepoints. (a) and (b) were  
336 performed using the ‘DESeq’ function of DESeq2 using all samples, with results subsequently  
337 summarized using the ‘results’ function with the ‘alpha’ parameter set to 0.05; *p*-values were  
338 adjusted using the Benjamini-Hochberg FDR method (43), with differentially expressed genes  
339 filtered for those falling below an adjusted *p*-value of 0.05. For (c), infected/mock samples were  
340 subset to individual timepoints, with differential expression calculated using DESeq as described  
341 above. Additionally, given the smaller number of samples at individual time-points, differential-  
342 expression analysis was also performed with relaxation of the low-count filter described above,  
343 with results and *p*-value adjustments performed as above.

#### 344 **Viral transcript quantification**

345 Paired-end sequencing reads were mapped to CDS regions of the SARS-CoV-2 genomic  
346 sequence (Assembly ASM985889v3 - GCF\_009858895.2) obtained from NCBI, indexed using  
347 the ‘index’ function of Salmon (version 0.14.0) (38) with a k-mer size of 31. Subsequently, reads  
348 were aligned using the Salmon ‘quant’ function with the following parameters: “-l A --  
349 numBootstraps 100 --gcBias --validateMappings”. All other parameters were left to defaults.  
350 Salmon quantification files were imported into R (version 3.6.1) (39) using the tximport library  
351 (version 1.14.0) (40) with the ‘type’ option set to ‘salmon’. All other parameters were set to  
352 default. Transcripts were mapped to their corresponding gene products via GTF files obtained  
353 from NCBI. Count data was subsequently loaded into DESeq2 (version 1.26.0) (41) using the  
354 ‘DESeqDataSetFromTximport’ function. Principal Component Analysis (PCA) of samples  
355 across viral genes was performed using the ‘vst’ function in DESeq2 (default settings) and was  
356 subsequently plotted with the ggplot2 package in R (42). As viral transcript levels increased over  
357 time post-infection, we first converted non-normalized transcript counts to a log<sub>2</sub> scale, and  
358 subsequently compared these across time-points (Fig. 1B; *SI Appendix*, Table S1). To look at the  
359 changes in the expression of viral transcripts relative to total viral expression as a function of  
360 post-infection time, normalized transcript counts were used to perform differential-expression  
361 analysis with DESeq2. Results and p-value adjustments were performed as described above.

362 In order to compare host/viral expression patterns, normalized transcript counts from  
363 infected samples were compared with either normalized or non-normalized viral transcript  
364 counts (from the same sample) across time-points. For each viral transcript (n = 12), all host  
365 genes (n = 15,760, after filtering described above) were tested for correlated expression changes  
366 across matched infected samples (n = 18, across 5 time-points) using Pearson’s correlation  
367 coefficient (via the cor.test function in R). Correlation test p-values were adjusted across all-by-



368 all comparisons using the Benjamini-Hochberg FDR method, and gene-transcript pairs at  
369 adjusted  $p$ -value  $< 0.05$  were retained. To account for possible effects of cellular response to  
370 plate incubation, viral transcript abundance was averaged at each time-point and compared to  
371 host transcript abundance similarly averaged at each time-point for non-infected samples;  
372 correlation testing was done all-by-all for  $n = 5$  data-points. Host genes that correlated with viral  
373 transcription in mock samples across time were removed from subsequent analyses; to increase  
374 stringency, mock correlation was defined using un-adjusted  $p$ -value  $< 0.05$ . Host genes were  
375 sorted by correlation coefficient (with any given viral transcript), with the top 100 unique genes  
376 retained for visualization. Normalized host transcript counts were z-score transformed per-gene  
377 using the ‘scale’ function in R, with normalized/un-normalized viral transcript counts similarly  
378 transformed per-transcript. Resulting z-score expression heatmaps were generated using the  
379 ComplexHeatmap library in R (version 2.2.0) (44). Heatmaps were generated for normalized/un-  
380 normalized viral transcript counts, given the different information revealed by absolute and  
381 relative viral expression patterns.

### 382 **Viral genome mapping**

383 Paired-end RNA-seq reads were filtered for quality control with Trim Galore! (version  
384 0.6.4\_dev) (45) and mapped to the SARS-CoV-2 reference sequence (NC\_045512.2) with the  
385 Burrow-Wheeler Aligner (46), using the BWA-MEM algorithm (47). Output SAM files were  
386 sorted and compressed into BAM files using Samtools (version 1.10) (48). Read coverage  
387 visualization was performed from within the R statistical environment (version 4.0.0) (39) using  
388 the “scanBam” function from the Rsamtools R package (version 1.32.0) to extract read coverage  
389 data and the ggplot2 R package (version 3.3.0) (42) to plot read coverage histograms (using 300  
390 bins across the SARS-CoV-2 sequence).

### 391 **Cellular pathway enrichment analysis**

392 To determine cellular pathways that were associated with differentially expressed genes (DEGs),  
393 the ActivePathways R (version 1.0.1) (49) package was utilized to perform gene-set based  
394 pathway enrichment analysis. DEGs at each time point were treated as an independent set for  
395 enrichment analysis. Fisher's combined probability test was used to enrich pathways after *p*-  
396 value adjustment using Holm-Bonferroni correction. Pathways of gene-set size less than 5 and  
397 greater than 1000 were excluded. Only pathways enriched at individual time-points were  
398 considered for downstream analysis; pathways enriched across combined timepoints as  
399 determined by ActivePathways Brown's *p*-value merging method were filtered out. Visualization  
400 of enriched pathways across timepoints was done using Cytoscape (version 3.8.0) (50) and the  
401 EnrichmentMap plugin (version 3.2.1) (51), as outlined by Reimand *et al.* (52). Up-to-date Gene-  
402 Matrix-Transposed (GMT) files containing information on pathways for the Gene Ontology  
403 (GO) Molecular Function (MF), GO Biological Process (BP) (53) and REACTOME (54)  
404 pathway databases were utilized with ActivePathways. Only pathways that were enriched at  
405 specific time points were considered. Bar plots displaying top ActivePathway GO terms and  
406 REACTOME enrichments for infection versus mock were plotted using the ggplot2 R package  
407 (version 3.2.1) for 1, 2, 3, and 12 hour time points. Zero and 6 hour time points were omitted due  
408 to a lack of sufficient numbers of differentially expressed genes required for functional  
409 enrichment analysis.

410 **Poly(I:C) transfection and IFN $\beta$  treatment.** Calu-3 cells were mock transfected with 4  $\mu$ l of  
411 lipofectamine 3000 (ThermoFisher Scientific) only or transfected with 100 ng of poly(I:C)  
412 (InvivoGen, San Diego, CA, USA). Recombinant human IFN $\beta$ 1 was generated using *Drosophila*  
413 Schneider 2 (S2) cells following manufacturer's recommendation and by using ThermoFisher

414 Scientific's *Drosophila* Expression system. As a control, recombinant GFP was also generated  
415 using the same protocol and used for mock treated cells. For VSV-GFP, HSV-GFP and H1N1-  
416 mNeon infections, cells were treated with increasing concentrations of IFN $\beta$ 1 or GFP (control).  
417 SARS-CoV-2 infected cells were treated with 200  $\mu$ g/ml of IFN $\beta$ 1 or GFP.

418 **Quantitative PCR.** Calu-3 cells were seeded at a density of  $3 \times 10^5$  cells/well in 12-well plates.  
419 Cells were infected with SARS-CoV-2 and RNA extraction was performed using RNeasy<sup>®</sup> Mini  
420 Kit (Qiagen, Hilden, Germany) according to manufacturer's protocol. 200 ng of purified RNA  
421 was reverse transcribed using iScript<sup>™</sup> gDNA Clear cDNA Synthesis Kit (Bio-Rad, Hercules,  
422 CA, USA). Quantitative PCR reactions were performed with TaqMan<sup>™</sup> Universal PCR Master  
423 Mix (Applied Biosystems, Foster City, CA, USA) using pre-designed Taqman gene expression  
424 assays (ThermoFisher Scientific) for *IFN $\beta$ 1* (catalog #4331182), *IRF7* (catalog #4331182), *IFIT1*  
425 (catalog #4331182) and *GAPDH* (catalog #4331182) according to manufacturer's protocol.  
426 Relative mRNA expression was normalized to *GAPDH* and presented as  $1/\Delta Ct$ .

427 **Immunoblots.** Calu-3 cells were seeded at a density of  $3 \times 10^5$  cells/well in 12-well plates. Cells  
428 were infected with SARS-CoV-2 at an MOI of 2. Control cells were sham infected. Twelve  
429 hours post infection, cells were transfected or treated with poly(I:C) or IFN $\beta$ , respectively. Cell  
430 lysates were harvested for immunoblots and analyzed on reducing gels as mentioned previously  
431 (33). Briefly, samples were denatured in a reducing sample buffer and analyzed on a reducing  
432 gel. Proteins were blotted from the gel onto polyvinylidene difluoride (PVDF) membranes  
433 (Immobilon, EMD Millipore, Burlington, MA, USA) and detected using primary and secondary  
434 antibodies. Primary antibodies used were: 1:1000 mouse anti-GAPDH (EMD Millipore;  
435 Catalogue number: AB2302; RRID: AB\_10615768), 1:1000 mouse anti-SARS-CoV-2 N  
436 (ThermoFisher Scientific; Catalogue number: MA5-29981; RRID: AB\_2785780 and 1:1000

437 rabbit anti-IFIT1 (ThermoFisher Scientific; Catalogue number: PA3-848; RRID: AB\_1958733).  
438 Secondary antibodies used were: 1:5000 donkey anti-rabbit 800 (LI-COR Biosciences, Lincoln,  
439 NE, USA; Catalogue number: 926-32213; RRID: 621848) and 1:5000 goat anti-mouse 680 (LI-  
440 COR Biosciences; Catalogue number: 925-68070; RRID: AB\_2651128). Blots were observed  
441 and imaged using Image Studio (LI-COR Biosciences) on the Odyssey CLx imaging system (LI-  
442 COR Biosciences).

443 **Antiviral bioassay.** THF cells were pre-treated or mock treated with recombinant human IFN $\beta$ ,  
444 followed by VSV-GFP, HSV-GFP or H1N1-mNeon infection at an MOI of 1. Infected cells were  
445 incubated at 37°C for 1 hour with gentle rocking every 15 minutes. After 1 hr, virus inoculum  
446 was aspirated and Minimum Essential Medium (MEM) with Earle's salts (Sigma) containing 2%  
447 FBS and 1% carboxymethyl cellulose (CMC; Sigma) was added on the cells. Cells were  
448 incubated for 19 hours at 37°C and green fluorescent protein (GFP) or mNeon levels were  
449 measured using a typhoon scanner (Amersham, GE Healthcare, Chicago, IL, USA).

450 **Statistics.** Statistical analyses for RNA-seq data were performed in R and are mentioned under  
451 the respective RNA-seq analyses sections. All other statistical calculations were performed in  
452 GraphPad Prism (version 8.4.2; [www.graphpad.com](http://www.graphpad.com)) using two-tailed paired t-test. Significance  
453 values are indicated in the figures and figure legends.  $p^* < 0.05$ ,  $** < 0.01$ ,  $*** < 0.001$  and  
454  $**** < 0.0001$ .

## 455 **Data Availability**

456 The DESeq2 normalized transcript counts for all genes with RNA-Seq data, significant or  
457 otherwise, plus the raw sequencing FASTQ reads have been deposited into the Gene Expression  
458 Omnibus (GEO) database with NCBI GEO accession number GSE151513.

## 459 **Acknowledgements**

460 This study was supported by a Canadian Institutes of Health Research (CIHR) COVID-19 rapid  
461 response grant to principal applicant K.M. and Co-Applicants A.B., A.G.M., M.S.M. and S.M.  
462 A.B. was funded by the Natural Sciences and Engineering Research Council of Canada  
463 (NSERC). Computer resources were in part supplied by the McMaster Service Lab and  
464 Repository computing cluster, funded in part by grants to A.G.M. from the Canadian Foundation  
465 for Innovation. J.A.H. is supported by the Canada Research Chairs Program and an Ontario Early  
466 Career Researcher Award. M.S.M. is supported by a CIHR COVID-19 rapid response grant, a  
467 CIHR New Investigator Award and an Ontario Early Researcher Award.

## 468 **References**

- 469 1. P. Zhou *et al.*, A pneumonia outbreak associated with a new coronavirus of probable bat  
470 origin. *Nature* **579**, 270-273 (2020).
- 471 2. T. Kawai, S. Akira, Innate immune recognition of viral infection. *Nat Immunol* **7**, 131-  
472 137 (2006).
- 473 3. S. Koyama, K. J. Ishii, C. Coban, S. Akira, Innate immune response to viral infection.  
474 *Cytokine* **43**, 336-341 (2008).
- 475 4. K. S. Schulz, K. L. Mossman, Viral Evasion Strategies in Type I IFN Signaling - A  
476 Summary of Recent Developments. *Front Immunol* **7**, 498 (2016).
- 477 5. M. G. Katze, Y. He, M. Gale, Jr., Viruses and interferon: a fight for supremacy. *Nat Rev*  
478 *Immunol* **2**, 675-687 (2002).
- 479 6. E. de Wit, N. van Doremalen, D. Falzarano, V. J. Munster, SARS and MERS: recent  
480 insights into emerging coronaviruses. *Nat Rev Microbiol* **14**, 523-534 (2016).

- 481 7. K. L. Siu *et al.*, Middle east respiratory syndrome coronavirus 4a protein is a double-  
482 stranded RNA-binding protein that suppresses PACT-induced activation of RIG-I and  
483 MDA5 in the innate antiviral response. *J Virol* **88**, 4866-4876 (2014).
- 484 8. X. Lu, J. Pan, J. Tao, D. Guo, SARS-CoV nucleocapsid protein antagonizes IFN-beta  
485 response by targeting initial step of IFN-beta induction pathway, and its C-terminal  
486 region is critical for the antagonism. *Virus Genes* **42**, 37-45 (2011).
- 487 9. X. Chen *et al.*, SARS coronavirus papain-like protease inhibits the type I interferon  
488 signaling pathway through interaction with the STING-TRAF3-TBK1 complex. *Protein*  
489 *Cell* **5**, 369-381 (2014).
- 490 10. Y. Yang *et al.*, The structural and accessory proteins M, ORF 4a, ORF 4b, and ORF 5 of  
491 Middle East respiratory syndrome coronavirus (MERS-CoV) are potent interferon  
492 antagonists. *Protein Cell* **4**, 951-961 (2013).
- 493 11. D. Blanco-Melo *et al.*, Imbalanced Host Response to SARS-CoV-2 Drives Development  
494 of COVID-19. *Cell* 10.1016/j.cell.2020.04.026 (2020).
- 495 12. J. Hadjadj *et al.*, Impaired type I interferon activity and exacerbated inflammatory  
496 responses in severe Covid-19 patients. *medRxiv* 10.1101/2020.04.19.20068015 (2020).
- 497 13. S. Trouillet-Assant *et al.*, Type I IFN immunoprofiling in COVID-19 patients. *J Allergy*  
498 *Clin Immunol* 10.1016/j.jaci.2020.04.029 (2020).
- 499 14. A. Banerjee, K. Baid, K. Mossman, Molecular Pathogenesis of Middle East Respiratory  
500 Syndrome (MERS) Coronavirus. *Curr Clin Microbiol Rep* **6**, 139-147 (2019).
- 501 15. S. G. Sawicki, D. L. Sawicki, S. G. Siddell, A contemporary view of coronavirus  
502 transcription. *J Virol* **81**, 20-29 (2007).

- 503 16. D. Niemeyer *et al.*, Middle East respiratory syndrome coronavirus accessory protein 4a is  
504 a type I interferon antagonist. *J Virol* **87**, 12489-12495 (2013).
- 505 17. P. Y. Lui *et al.*, Middle East respiratory syndrome coronavirus M protein suppresses type  
506 I interferon expression through the inhibition of TBK1-dependent phosphorylation of  
507 IRF3. *Emerg Microbes Infect* **5**, e39 (2016).
- 508 18. E. Dong, H. Du, L. Gardner, An interactive web-based dashboard to track COVID-19 in  
509 real time. *Lancet Infect Dis* **20**, 533-534 (2020).
- 510 19. M. M. Lai, Coronavirus: organization, replication and expression of genome. *Annu Rev*  
511 *Microbiol* **44**, 303-333 (1990).
- 512 20. S. Perlman, J. Netland, Coronaviruses post-SARS: update on replication and  
513 pathogenesis. *Nat Rev Microbiol* **7**, 439-450 (2009).
- 514 21. A. R. Fehr, S. Perlman, Coronaviruses: an overview of their replication and pathogenesis.  
515 *Methods Mol Biol* **1282**, 1-23 (2015).
- 516 22. Y. Xing *et al.*, The papain-like protease of porcine epidemic diarrhea virus negatively  
517 regulates type I interferon pathway by acting as a viral deubiquitinase. *J Gen Virol* **94**,  
518 1554-1567 (2013).
- 519 23. Z. Ding *et al.*, Porcine epidemic diarrhea virus nucleocapsid protein antagonizes beta  
520 interferon production by sequestering the interaction between IRF3 and TBK1. *J Virol*  
521 **88**, 8936-8945 (2014).
- 522 24. M. Hackbart, X. Deng, S. C. Baker, Coronavirus endoribonuclease targets viral  
523 polyuridine sequences to evade activating host sensors. *Proc Natl Acad Sci U S A* **117**,  
524 8094-8103 (2020).

- 525 25. X. Deng *et al.*, Coronavirus nonstructural protein 15 mediates evasion of dsRNA sensors  
526 and limits apoptosis in macrophages. *Proc Natl Acad Sci U S A* **114**, E4251-E4260  
527 (2017).
- 528 26. E. Kindler *et al.*, Early endonuclease-mediated evasion of RNA sensing ensures efficient  
529 coronavirus replication. *PLoS Pathog* **13**, e1006195 (2017).
- 530 27. Y. J. Hou *et al.*, SARS-CoV-2 Reverse Genetics Reveals a Variable Infection Gradient in  
531 the Respiratory Tract. *Cell* 10.1016/j.cell.2020.05.042 (2020).
- 532 28. E. F. Foxman *et al.*, Temperature-dependent innate defense against the common cold  
533 virus limits viral replication at warm temperature in mouse airway cells. *Proc Natl Acad*  
534 *Sci U S A* **112**, 827-832 (2015).
- 535 29. R. Wolfel *et al.*, Virological assessment of hospitalized patients with COVID-2019.  
536 *Nature* 10.1038/s41586-020-2196-x (2020).
- 537 30. Y. M. Arabi *et al.*, Treatment of Middle East respiratory syndrome with a combination of  
538 lopinavir/ritonavir and interferon-beta 1b (MIRACLE trial): statistical analysis plan for a  
539 recursive two-stage group sequential randomized controlled trial. *Trials* **21**, 8 (2020).
- 540 31. I. F.-N. Hung *et al.*, Triple combination of interferon beta-1b, lopinavir-ritonavir, and  
541 ribavirin in the treatment of patients admitted to hospital with COVID-19: an open-label,  
542 randomised, phase 2 trial. *The Lancet* **395**, 1695-1704 (2020).
- 543 32. J. A. Aguiar *et al.*, Transcriptomic and barrier responses of human airway epithelial cells  
544 exposed to cannabis smoke. *Physiol Rep* **7**, e14249 (2019).
- 545 33. A. Banerjee *et al.*, Positive Selection of a Serine Residue in Bat IRF3 Confers Enhanced  
546 Antiviral Protection. *iScience* **23**, 100958 (2020).



- 547 34. R. S. Noyce *et al.*, Membrane perturbation elicits an IRF3-dependent, interferon-  
548 independent antiviral response. *J Virol* **85**, 10926-10931 (2011).
- 549 35. R. L. Minaker, K. L. Mossman, J. R. Smiley, Functional inaccessibility of quiescent  
550 herpes simplex virus genomes. *Virol J* **2**, 85 (2005).
- 551 36. A. Banerjee *et al.*, Isolation, sequence, infectivity, and replication kinetics of Severe  
552 Acute Respiratory Syndrome Coronavirus 2. *Emerging Infectious Diseases* **In Press**  
553 (2020).
- 554 37. S. E. Hunt *et al.*, Ensembl variation resources. *Database (Oxford)* **2018** (2018).
- 555 38. R. Patro, G. Duggal, M. I. Love, R. A. Irizarry, C. Kingsford, Salmon provides fast and  
556 bias-aware quantification of transcript expression. *Nat Methods* **14**, 417-419 (2017).
- 557 39. RCoreTeam (2017) R: A language and environment for statistical computing.
- 558 40. C. Soneson, M. I. Love, M. D. Robinson, Differential analyses for RNA-seq: transcript-  
559 level estimates improve gene-level inferences. *F1000Research* **4** (2015).
- 560 41. M. I. Love, W. Huber, S. Anders, Moderated estimation of fold change and dispersion for  
561 RNA-seq data with DESeq2. *Genome Biol* **15**, 550 (2014).
- 562 42. H. Wickham, *ggplot2: Elegant graphics for data analysis* (Springer-Verlag, New York,  
563 2009).
- 564 43. Y. Benjamini, Y. Hochberg, Controlling the False Discovery Rate: A Practical and  
565 Powerful Approach to Multiple Testing. *Journal of the Royal Statistical Society: Series B*  
566 (*Methodological*) **57**, 289-300 (1995).
- 567 44. Z. Gu, R. Eils, M. Schlesner, Complex heatmaps reveal patterns and correlations in  
568 multidimensional genomic data. *Bioinformatics* **32**, 2847-2849 (2016).
- 569 45. F. Krueger (2019) Trim Galore.

- 570 46. H. Li, R. Durbin, Fast and accurate short read alignment with Burrows-Wheeler  
571 transform. *Bioinformatics* **25**, 1754-1760 (2009).
- 572 47. H. Li, Aligning sequence reads, clone sequences and assembly contigs with BWA-MEM.  
573 *arXiv:1303.3997 [q-bio.GN]* (2013).
- 574 48. H. Li *et al.*, The Sequence Alignment/Map format and SAMtools. *Bioinformatics* **25**,  
575 2078-2079 (2009).
- 576 49. M. Paczkowska *et al.*, Integrative pathway enrichment analysis of multivariate omics  
577 data. *Nat Commun* **11**, 735 (2020).
- 578 50. P. Shannon *et al.*, Cytoscape: a software environment for integrated models of  
579 biomolecular interaction networks. *Genome Res* **13**, 2498-2504 (2003).
- 580 51. D. Merico, R. Isserlin, O. Stueker, A. Emili, G. D. Bader, Enrichment map: a network-  
581 based method for gene-set enrichment visualization and interpretation. *PLoS One* **5**,  
582 e13984 (2010).
- 583 52. J. Reimand *et al.*, Pathway enrichment analysis and visualization of omics data using  
584 g:Profiler, GSEA, Cytoscape and EnrichmentMap. *Nat Protoc* **14**, 482-517 (2019).
- 585 53. C. The Gene Ontology, The Gene Ontology Resource: 20 years and still GOing strong.  
586 *Nucleic Acids Res* **47**, D330-D338 (2019).
- 587 54. B. Jassal *et al.*, The reactome pathway knowledgebase. *Nucleic Acids Res* **48**, D498-  
588 D503 (2020).

589

590

591

592

593 **Figures and Figure Legends**



595 **Figure 1. SARS-CoV-2 and cellular gene expression.** Calu-3 cells were infected with SARS-  
596 CoV-2 at an MOI of 2. Virus and host gene expression were determined using time-series RNA-  
597 seq analyses. **(A)** SARS-CoV-2 gene expression over 12 hours ( $n = 3$ /time point). The genome  
598 organization of SARS-CoV-2 is indicated above in pink. **(B)** Major SARS-CoV-2 gene  
599 expression levels at different times post infection ( $n = 3$ /time point). **(C)** Cellular processes that  
600 are down or upregulated at different times post infection. The size of the circles represents the  
601 number of genes that are down or upregulated at different times after infection ( $n = 3$ /time point).  
602 **(D)** Cellular genes ( $n = 124$ ) that are significantly up or downregulated (FDR-adjusted  $p < 0.05$ ;  
603  $|\log_2FC| > 1$ ) in SARS-CoV-2 infected cells, relative to mock infected cells at different times  
604 post infection. Transcript levels are shown as z-score normalized expression (scaled by gene).  
605 **(E)** Transcript abundance of type I interferon (IFN) genes (*IFN $\beta$*  and *IFN $\lambda 1-3$* ) in mock infected  
606 and SARS-CoV-2 infected Calu-3 cells at different times (Mean  $\pm$  SD;  $n = 3$ ). **(F)** Transcript  
607 abundance of representative interferon stimulated genes (ISGs) in mock infected and SARS-  
608 CoV-2 infected Calu-3 cells at different times (Mean  $\pm$  SD;  $n = 3$ ). For Figs. A-D, statistical  
609 analysis was performed in R (see methods). For Figs. E and F, statistical significance was  
610 calculated using two-tailed paired t-test. hpi, hours post infection.  $p^* < 0.05$ ,  $** < 0.01$ .  
611



612

613 **Figure 2. SARS-CoV-2 is unable to modulate type I IFN gene expression and downstream**  
614 **ISG production.** To determine if SARS-CoV-2 is able to induce type I IFN production, Calu-3  
615 cells were infected at an MOI of 2 for 12 hours. Transcript levels for *IFN $\beta$*  were quantified using  
616 qPCR. To assess if SARS-CoV-2 can modulate *IFN $\beta$*  gene expression and downstream  
617 stimulation of ISGs, Calu-3 cells were infected with SARS-CoV-2 at an MOI of 2 for 12 hours,  
618 following which cells were treated or transfected with recombinant *IFN $\beta$*  or poly(I:C),  
619 respectively for 6 hours. Mock infected and mock treated cells served as controls. **(A)** *IFN $\beta$*   
620 transcript levels in SARS-CoV-2 infected or mock infected Calu-3 cells, normalized to *GAPDH*  
621 (Mean  $\pm$  SD; n = 6). **(B)** *IRF7* transcript levels in SARS-CoV-2 infected or mock infected Calu-3  
622 cells, normalized to *GAPDH* (Mean  $\pm$  SD; n = 6). **(C)** *IFIT1* transcript levels in SARS-CoV-2  
623 infected or mock infected Calu-3 cells, normalized to *GAPDH* (Mean  $\pm$  SD; n = 6). **(D)** *IFN $\beta$*   
624 transcript levels in SARS-CoV-2 infected or mock infected, and poly(I:C) transfected or mock  
625 transfected Calu-3 cells, normalized to *GAPDH* (Mean  $\pm$  SD; n = 6). **(E)** *IFIT1* transcript levels  
626 in SARS-CoV-2 infected or mock infected, and poly(I:C) transfected or mock transfected Calu-3  
627 cells, normalized to *GAPDH* (Mean  $\pm$  SD; n = 6). **(F)** *IRF7* transcript levels in SARS-CoV-2  
628 infected or mock infected, and poly(I:C) transfected or mock transfected Calu-3 cells,  
629 normalized to *GAPDH* (Mean  $\pm$  SD; n = 6). **(G)** SARS-CoV-2 N, IFIT1 and GAPDH protein  
630 expression in SARS-CoV-2 infected or mock infected, and poly(I:C) transfected or mock  
631 transfected Calu-3 cells (Mean  $\pm$  SD; n = 3). **(H)** *IRF7* transcript levels in SARS-CoV-2 infected  
632 or mock infected, and recombinant *IFN $\beta$*  treated or mock treated Calu-3 cells, normalized to  
633 *GAPDH* (Mean  $\pm$  SD; n = 6). **(I)** *IFIT1* transcript levels in SARS-CoV-2 infected or mock  
634 infected, and recombinant *IFN $\beta$*  treated or mock treated Calu-3 cells, normalized to *GAPDH*  
635 (Mean  $\pm$  SD; n = 6). **(J)** SARS-CoV-2 N, IFIT1 and GAPDH protein expression in SARS-CoV-2

636 infected or mock infected, and recombinant IFN $\beta$  treated or mock treated Calu-3 cells (Mean  $\pm$   
637 SD; n = 3). Statistical significance was calculated using two-tailed paired t-test. Ct, cycle  
638 threshold.  $p^* < 0.05$ ,  $** < 0.01$ ,  $*** < 0.001$  and  $**** < 0.0001$ .

639

640

641

642

643

644

645

646

647

648

649

650

651

652

653

654

655

656

657 **SI Appendix**

658 **Tables**

659

660 **Table S1.** Mean raw read counts for SARS-CoV-2 genes. INF, SARS-CoV-2 infected; H, hours;  
661 SD, standard deviation.

662

| Mean<br>INF<br>0H | SD<br>INF<br>0H | Mean<br>INF<br>1H | SD<br>INF<br>1H | Mean<br>INF<br>2H | SD<br>INF<br>2H | Mean<br>INF<br>3H | SD<br>INF<br>3H | Mean<br>INF<br>6H | SD<br>INF<br>6H | Mean<br>INF<br>12H | SD<br>INF<br>12H | SARS-<br>CoV-2<br>gene | Transcript                                        |
|-------------------|-----------------|-------------------|-----------------|-------------------|-----------------|-------------------|-----------------|-------------------|-----------------|--------------------|------------------|------------------------|---------------------------------------------------|
| 257.6<br>7        | 38.59           | 285.3<br>3        | 56.13           | 243.6<br>7        | 39.25           | 278.0<br>0        | 23.00           | 12173<br>.33      | 3006.<br>93     | 25827<br>.33       | 2054.<br>93      | ORF1ab                 | lcl NC_04551<br>2.2_cds_YP_0<br>09724389.1_1      |
| 1.00              | 1.73            | 0.00              | 0.00            | 0.33              | 0.58            | 0.00              | 0.00            | 33.67             | 6.81            | 1061.<br>00        | 468.0<br>3       | ORF1a                  | lcl NC_04551<br>2.2_cds_YP_0<br>09725295.1_2      |
| 500.6<br>7        | 94.52           | 491.3<br>3        | 86.19           | 378.0<br>0        | 61.39           | 521.6<br>7        | 49.69           | 19232<br>.33      | 3952.<br>46     | 26903<br>.33       | 3860.<br>82      | spike                  | lcl NC_04551<br>2.2_cds_YP_0<br>09724390.1_3      |
| 173.6<br>7        | 24.99           | 172.3<br>3        | 43.68           | 127.3<br>3        | 17.16           | 203.3<br>3        | 26.50           | 9995.<br>00       | 1736.<br>00     | 13976<br>.33       | 2233.<br>55      | ORF3a                  | lcl NC_04551<br>2.2_cds_YP_0<br>09724391.1_4      |
| 43.67             | 5.51            | 44.67             | 13.65           | 39.00             | 2.65            | 63.00             | 11.53           | 2903.<br>33       | 485.1<br>5      | 4086.<br>33        | 627.7<br>0       | envelope               | lcl NC_04551<br>2.2_cds_YP_0<br>09724392.1_5      |
| 199.6<br>7        | 27.02           | 196.0<br>0        | 37.32           | 162.3<br>3        | 28.87           | 298.6<br>7        | 19.60           | 22344<br>.33      | 3354.<br>18     | 31200<br>.33       | 4915.<br>23      | membran<br>e           | lcl NC_04551<br>2.2_cds_YP_0<br>09724393.1_6      |
| 34.67             | 2.08            | 32.33             | 10.50           | 25.00             | 7.81            | 45.33             | 1.53            | 3508.<br>00       | 509.1<br>2      | 4704.<br>67        | 886.5<br>6       | ORF6                   | lcl NC_04551<br>2.2_cds_YP_0<br>09724394.1_7      |
| 107.3<br>3        | 19.50           | 102.3<br>3        | 23.35           | 94.00             | 22.61           | 173.6<br>7        | 34.00           | 14834<br>.00      | 2357.<br>53     | 21920<br>.67       | 3441.<br>71      | ORF7a                  | lcl NC_04551<br>2.2_cds_YP_0<br>09724395.1_8      |
| 10.33             | 2.52            | 11.67             | 2.31            | 15.33             | 1.53            | 20.67             | 1.15            | 1516.<br>33       | 241.0<br>0      | 2191.<br>33        | 526.1<br>7       | ORF7b                  | lcl NC_04551<br>2.2_cds_YP_0<br>09725318.1_9      |
| 109.3<br>3        | 22.19           | 107.0<br>0        | 27.22           | 98.00             | 21.70           | 189.0<br>0        | 14.00           | 14651<br>.33      | 2136.<br>80     | 21518<br>.67       | 3992.<br>04      | ORF8                   | lcl NC_04551<br>2.2_cds_YP_0<br>09724396.1_1<br>0 |
| 1251.<br>00       | 230.9<br>7      | 1157.<br>33       | 247.5<br>2      | 1067.<br>67       | 144.5<br>8      | 2945.<br>67       | 402.6<br>1      | 25855<br>3.00     | 34843<br>.96    | 39322<br>1.67      | 62159<br>.07     | nucleoca<br>psid       | lcl NC_04551<br>2.2_cds_YP_0<br>09724397.2_1<br>1 |
| 112.3<br>3        | 27.57           | 97.00             | 22.52           | 94.67             | 10.69           | 250.0<br>0        | 19.00           | 18385<br>.33      | 2239.<br>71     | 27679<br>.00       | 5406.<br>01      | ORF10                  | lcl NC_04551<br>2.2_cds_YP_0<br>09725255.1_1<br>2 |

663

664

665

666

667

668

669

670



671 **Table S2.** Mean normalized read counts for differentially expressed IFN and ISG transcripts. H,  
 672 hour; INF, SARS-CoV-2 infected; MOCK, mock infected; IFN, interferon; ISG, interferon  
 673 stimulated genes.  
 674

|             |             | 0H<br>INF<br>(N=3) | 0H<br>MOCK<br>(N=3) | 1H<br>INF<br>(N=3) | 1H<br>MOCK<br>(N=3) | 2H<br>INF<br>(N=3) | 2H<br>MOCK<br>(N=3) | 3H<br>INF<br>(N=3) | 3H<br>MOCK<br>(N=3) | 6H<br>INF<br>(N=3) | 6H<br>MOCK<br>(N=3) | 12H<br>INF<br>(N=3) | 12H<br>MOCK<br>(N=3) |
|-------------|-------------|--------------------|---------------------|--------------------|---------------------|--------------------|---------------------|--------------------|---------------------|--------------------|---------------------|---------------------|----------------------|
| <b>IFNs</b> | IFNB<br>1   | 1.35               | 0.00                | 1.21               | 0.41                | 1.48               | 0.97                | 0.57               | 1.93                | 6.40               | 0.30                | 21.23               | 0.89                 |
|             | IFNL<br>1   | 3.49               | 3.45                | 2.20               | 4.80                | 4.93               | 5.46                | 3.17               | 1.90                | 7.00               | 2.66                | 15.07               | 0.73                 |
|             | IFNL<br>2   | 0.00               | 0.00                | 0.36               | 0.96                | 4.11               | 0.35                | 0.28               | 0.00                | 4.66               | 0.00                | 8.61                | 0.00                 |
|             | IFNL<br>3   | 0.35               | 0.00                | 0.58               | 0.44                | 2.38               | 0.31                | 0.88               | 0.00                | 3.02               | 0.00                | 8.46                | 0.00                 |
| <b>ISGs</b> | IFIT1<br>2  | 388.4              | 358.77              | 370.8              | 487.33              | 447.5              | 590.32              | 425.3              | 498.05              | 463.1              | 408.65              | 2790.5              | 367.50               |
|             | IRF7<br>0   | 278.5              | 283.73              | 320.4              | 284.00              | 339.9              | 383.89              | 399.0              | 363.67              | 399.9              | 432.29              | 966.54              | 305.31               |
|             | OAS<br>2    | 172.6              | 236.24              | 178.1              | 222.85              | 287.6              | 208.20              | 252.8              | 296.10              | 292.3              | 378.90              | 2979.2              | 303.60               |
|             | MX1<br>8    | 588.4              | 620.75              | 624.7              | 647.52              | 758.9              | 800.13              | 839.4              | 867.29              | 728.2              | 811.68              | 3922.4              | 546.94               |
|             | RSA<br>D2   | 204.7              | 216.53              | 228.7              | 272.67              | 313.8              | 348.31              | 365.1              | 393.68              | 274.5              | 269.56              | 948.75              | 210.54               |
|             | SLC4<br>4A4 | 1247.              | 1171.72             | 1218.              | 1046.17             | 1138.              | 1128.19             | 1129.              | 1106.06             | 1010.              | 1142.19             | 1032.0              | 1298.09              |
|             | IFIH<br>1   | 1052.              | 1100.39             | 1134.              | 1163.76             | 1235.              | 1164.31             | 1223.              | 1371.55             | 1189.              | 1191.00             | 2492.6              | 1087.88              |
|             | GBP<br>1    | 506.7              | 512.73              | 503.5              | 608.29              | 496.7              | 485.28              | 458.1              | 509.15              | 530.0              | 509.53              | 1151.3              | 488.92               |
|             | IFI44<br>6  | 689.1              | 741.40              | 789.1              | 803.61              | 963.6              | 1113.99             | 997.0              | 1052.67             | 785.4              | 782.39              | 1889.5              | 671.51               |
|             | IFI27<br>9  | 311.4              | 318.74              | 302.6              | 399.59              | 343.3              | 472.30              | 328.2              | 361.48              | 333.6              | 351.85              | 921.55              | 342.54               |
|             | IFI6<br>2   | 592.8              | 612.04              | 599.9              | 697.80              | 673.0              | 1010.20             | 692.2              | 752.25              | 729.1              | 775.17              | 2066.3              | 709.85               |
|             | ISG1<br>5   | 430.9              | 447.57              | 443.6              | 533.02              | 465.8              | 704.43              | 490.4              | 554.07              | 473.8              | 502.97              | 1260.4              | 435.91               |
|             | IFIT2<br>3  | 657.2              | 698.02              | 676.4              | 795.49              | 645.5              | 732.08              | 455.7              | 504.29              | 493.4              | 422.04              | 1465.1              | 413.27               |
|             | USP1<br>8   | 212.2              | 217.53              | 218.0              | 257.03              | 253.5              | 301.50              | 266.1              | 297.44              | 243.5              | 232.66              | 873.18              | 218.27               |
|             | IFIT3<br>5  | 648.1              | 656.89              | 747.6              | 858.17              | 810.1              | 1069.67             | 567.2              | 668.13              | 458.2              | 428.90              | 1900.0              | 420.64               |
|             | CMP<br>K2   | 163.8              | 179.41              | 169.1              | 182.05              | 219.3              | 244.03              | 235.9              | 265.54              | 172.7              | 201.60              | 906.22              | 153.23               |
|             | XAF<br>1    | 58.53              | 82.76               | 73.40              | 53.61               | 69.79              | 60.14               | 79.67              | 55.09               | 86.30              | 91.97               | 513.01              | 90.51                |
|             | IFIT<br>M1  | 27.68              | 34.25               | 21.94              | 27.89               | 28.53              | 53.49               | 26.88              | 34.91               | 34.59              | 35.75               | 182.01              | 34.33                |
|             | MX2<br>5    | 82.11              | 87.24               | 69.22              | 81.96               | 100.7              | 83.43               | 87.84              | 87.48               | 108.0              | 78.88               | 547.98              | 64.92                |

675  
 676  
 677  
 678  
 679  
 680  
 681  
 682

683 **Table S3.** Pathway enrichment analysis. Significance was determined after FDR correction. H,  
 684 hour; 0, non-significant; 1, significant.  
 685

| term.id    | term.name                                                     | adjusted.p.val | 1H | 2H | 3H | 12H |
|------------|---------------------------------------------------------------|----------------|----|----|----|-----|
| GO:0000976 | transcription regulatory region sequence-specific DNA binding | 0.004824255    | 0  | 1  | 0  | 0   |
| GO:0001067 | regulatory region nucleic acid binding                        | 0.004203707    | 0  | 1  | 0  | 0   |
| GO:0001816 | cytokine production                                           | 0.005529472    | 0  | 0  | 0  | 1   |
| GO:0001817 | regulation of cytokine production                             | 0.001829233    | 0  | 0  | 0  | 1   |
| GO:0002230 | positive regulation of defense response to virus by host      | 0.002197834    | 0  | 0  | 0  | 1   |
| GO:0002831 | regulation of response to biotic stimulus                     | 8.60E-08       | 0  | 0  | 0  | 1   |
| GO:0002833 | positive regulation of response to biotic stimulus            | 0.008687053    | 0  | 0  | 0  | 1   |
| GO:0003690 | double-stranded DNA binding                                   | 0.000112873    | 0  | 1  | 0  | 0   |
| GO:0003712 | transcription coregulator activity                            | 1.30E-06       | 0  | 1  | 0  | 0   |
| GO:0003713 | transcription coactivator activity                            | 2.39E-05       | 0  | 1  | 0  | 0   |
| GO:0005178 | integrin binding                                              | 0.013874905    | 0  | 0  | 1  | 0   |
| GO:0008270 | zinc ion binding                                              | 0.000103938    | 0  | 1  | 0  | 0   |
| GO:0009615 | response to virus                                             | 1.39E-35       | 0  | 0  | 0  | 1   |
| GO:0010810 | regulation of cell-substrate adhesion                         | 0.008350323    | 0  | 1  | 0  | 0   |
| GO:0016482 | cytosolic transport                                           | 0.011086056    | 0  | 1  | 0  | 0   |
| GO:0019058 | viral life cycle                                              | 3.92E-11       | 0  | 0  | 0  | 1   |
| GO:0019079 | viral genome replication                                      | 3.87E-15       | 0  | 0  | 0  | 1   |
| GO:0019221 | cytokine-mediated signaling pathway                           | 8.45E-16       | 0  | 0  | 0  | 1   |
| GO:0019900 | kinase binding                                                | 0.003539788    | 0  | 1  | 0  | 0   |
| GO:0019901 | protein kinase binding                                        | 0.012867428    | 0  | 1  | 0  | 0   |
| GO:0030099 | myeloid cell differentiation                                  | 0.011382292    | 0  | 1  | 0  | 0   |
| GO:0031347 | regulation of defense response                                | 2.16E-05       | 0  | 0  | 0  | 1   |
| GO:0031589 | cell-substrate adhesion                                       | 0.002867293    | 0  | 1  | 0  | 0   |
| GO:0032020 | ISG15-protein conjugation                                     | 0.008627708    | 0  | 0  | 0  | 1   |
| GO:0032069 | regulation of nuclease activity                               | 1.26E-06       | 0  | 0  | 0  | 1   |
| GO:0032479 | regulation of type I interferon production                    | 4.92E-06       | 0  | 0  | 0  | 1   |
| GO:0032480 | negative regulation of type I interferon production           | 0.005210998    | 0  | 0  | 0  | 1   |
| GO:0032481 | positive regulation of type I interferon production           | 0.00531473     | 0  | 0  | 0  | 1   |
| GO:0032606 | type I interferon production                                  | 6.14E-06       | 0  | 0  | 0  | 1   |
| GO:0032607 | interferon-alpha production                                   | 0.005237546    | 0  | 0  | 0  | 1   |
| GO:0032647 | regulation of interferon-alpha production                     | 0.00400414     | 0  | 0  | 0  | 1   |
| GO:0032727 | positive regulation of interferon-alpha production            | 0.001567461    | 0  | 0  | 0  | 1   |
| GO:0034340 | response to type I interferon                                 | 9.21E-31       | 0  | 0  | 0  | 1   |
| GO:0034341 | response to interferon-gamma                                  | 1.44E-10       | 0  | 0  | 0  | 1   |
| GO:0034504 | protein localization to nucleus                               | 0.00295333     | 0  | 1  | 0  | 0   |
| GO:0035455 | response to interferon-alpha                                  | 3.29E-10       | 0  | 0  | 0  | 1   |
| GO:0035456 | response to interferon-beta                                   | 2.08E-07       | 0  | 0  | 0  | 1   |

|                    |                                                                     |             |   |   |   |   |
|--------------------|---------------------------------------------------------------------|-------------|---|---|---|---|
| GO:0042393         | histone binding                                                     | 0.002987285 | 0 | 1 | 0 | 0 |
| GO:0043900         | regulation of multi-organism process                                | 2.03E-17    | 0 | 0 | 0 | 1 |
| GO:0043901         | negative regulation of multi-organism process                       | 3.86E-17    | 0 | 0 | 0 | 1 |
| GO:0043902         | positive regulation of multi-organism process                       | 0.008274484 | 0 | 0 | 0 | 1 |
| GO:0043903         | regulation of symbiosis encompassing mutualism through parasitism   | 6.66E-20    | 0 | 0 | 0 | 1 |
| GO:0044212         | transcription regulatory region DNA binding                         | 0.004047416 | 0 | 1 | 0 | 0 |
| GO:0045069         | regulation of viral genome replication                              | 1.01E-16    | 0 | 0 | 0 | 1 |
| GO:0045071         | negative regulation of viral genome replication                     | 3.61E-17    | 0 | 0 | 0 | 1 |
| GO:0045088         | regulation of innate immune response                                | 5.98E-06    | 0 | 0 | 0 | 1 |
| GO:0045089         | positive regulation of innate immune response                       | 0.005979802 | 0 | 0 | 0 | 1 |
| GO:0046596         | regulation of viral entry into host cell                            | 0.048025337 | 0 | 0 | 0 | 1 |
| GO:0048525         | negative regulation of viral process                                | 3.26E-20    | 0 | 0 | 0 | 1 |
| GO:0050657         | nucleic acid transport                                              | 0.048485615 | 0 | 0 | 1 | 0 |
| GO:0050658         | RNA transport                                                       | 0.048485615 | 0 | 0 | 1 | 0 |
| GO:0050688         | regulation of defense response to virus                             | 0.002163216 | 0 | 0 | 0 | 1 |
| GO:0050691         | regulation of defense response to virus by host                     | 0.009541892 | 0 | 0 | 0 | 1 |
| GO:0050792         | regulation of viral process                                         | 1.31E-20    | 0 | 0 | 0 | 1 |
| GO:0051056         | regulation of small GTPase mediated signal transduction             | 0.026048495 | 0 | 1 | 0 | 0 |
| GO:0051607         | defense response to virus                                           | 1.25E-37    | 0 | 0 | 0 | 1 |
| GO:0060333         | interferon-gamma-mediated signaling pathway                         | 1.36E-13    | 0 | 0 | 0 | 1 |
| GO:0060337         | type I interferon signaling pathway                                 | 3.69E-31    | 0 | 0 | 0 | 1 |
| GO:0060700         | regulation of ribonuclease activity                                 | 6.89E-07    | 0 | 0 | 0 | 1 |
| GO:0060759         | regulation of response to cytokine stimulus                         | 0.000740173 | 0 | 0 | 0 | 1 |
| GO:0060760         | positive regulation of response to cytokine stimulus                | 0.007105564 | 0 | 0 | 0 | 1 |
| GO:0061629         | RNA polymerase II-specific DNA-binding transcription factor binding | 0.011126656 | 0 | 1 | 0 | 0 |
| GO:0070566         | adenylyltransferase activity                                        | 0.006545402 | 0 | 0 | 0 | 1 |
| GO:0071346         | cellular response to interferon-gamma                               | 1.05E-09    | 0 | 0 | 0 | 1 |
| GO:0071357         | cellular response to type I interferon                              | 3.69E-31    | 0 | 0 | 0 | 1 |
| GO:0098586         | cellular response to virus                                          | 0.0037813   | 0 | 0 | 0 | 1 |
| GO:1903900         | regulation of viral life cycle                                      | 1.50E-18    | 0 | 0 | 0 | 1 |
| GO:1903901         | negative regulation of viral life cycle                             | 1.15E-18    | 0 | 0 | 0 | 1 |
| GO:1990837         | sequence-specific double-stranded DNA binding                       | 0.002945526 | 0 | 1 | 0 | 0 |
| GO:2001251         | negative regulation of chromosome organization                      | 0.039979672 | 0 | 1 | 0 | 0 |
| REAC:R-HSA-1169408 | ISG15 antiviral mechanism                                           | 5.61E-12    | 0 | 0 | 0 | 1 |
| REAC:R-HSA-1169410 | Antiviral mechanism by IFN-stimulated genes                         | 5.77E-19    | 0 | 0 | 0 | 1 |
| REAC:R-HSA-1280215 | Cytokine Signaling in Immune system                                 | 1.52E-19    | 0 | 0 | 0 | 1 |
| REAC:R-HSA-168928  | DDX58/IFIH1-mediated induction of interferon-alpha/beta             | 0.001851135 | 0 | 0 | 0 | 1 |
| REAC:R-HSA-2990846 | SUMOylation                                                         | 0.000289223 | 0 | 1 | 0 | 0 |
| REAC:R-HSA-3108214 | SUMOylation of DNA damage response and repair proteins              | 0.023406467 | 0 | 1 | 0 | 0 |
| REAC:R-HSA-        | SUMO E3 ligases SUMOylate target proteins                           | 0.000850049 | 0 | 1 | 0 | 0 |

|                    |                                              |             |   |   |   |   |
|--------------------|----------------------------------------------|-------------|---|---|---|---|
| 3108232            |                                              |             |   |   |   |   |
| REAC:R-HSA-3247509 | Chromatin modifying enzymes                  | 0.016088428 | 0 | 1 | 0 | 0 |
| REAC:R-HSA-4839726 | Chromatin organization                       | 0.016088428 | 0 | 1 | 0 | 0 |
| REAC:R-HSA-6806834 | Signaling by MET                             | 2.89E-05    | 0 | 1 | 0 | 0 |
| REAC:R-HSA-877300  | Interferon gamma signaling                   | 2.97E-09    | 0 | 0 | 0 | 1 |
| REAC:R-HSA-8874081 | MET activates PTK2 signaling                 | 0.000994797 | 1 | 0 | 0 | 0 |
| REAC:R-HSA-8934593 | Regulation of RUNX1 Expression and Activity  | 0.000745328 | 0 | 1 | 0 | 0 |
| REAC:R-HSA-8983711 | OAS antiviral response                       | 3.29E-08    | 0 | 0 | 0 | 1 |
| REAC:R-HSA-9006934 | Signaling by Receptor Tyrosine Kinases       | 0.017643755 | 0 | 1 | 0 | 0 |
| REAC:R-HSA-909733  | Interferon alpha/beta signaling              | 2.97E-31    | 0 | 0 | 0 | 1 |
| REAC:R-HSA-913531  | Interferon Signaling                         | 4.75E-36    | 0 | 0 | 0 | 1 |
| REAC:R-HSA-918233  | TRAF3-dependent IRF activation pathway       | 0.000139967 | 0 | 0 | 0 | 1 |
| REAC:R-HSA-933541  | TRAF6 mediated IRF7 activation               | 0.018776243 | 0 | 0 | 0 | 1 |
| REAC:R-HSA-936440  | Negative regulators of DDX58/IFIH1 signaling | 0.000931238 | 0 | 0 | 0 | 1 |

686  
687  
688  
689  
690  
691  
692  
693  
694  
695  
696  
697  
698  
699  
700  
701  
702  
703  
704  
705  
706  
707  
708  
709

710 **Figures**

711



712

713 **Figure S1. SARS-CoV-2 transcripts clustering.** To determine SARS-CoV-2 replication  
714 kinetics in human cells using RNA-seq, we infected human lung epithelial cells (Calu-3) at a  
715 multiplicity of infection (MOI) of 2. One hour post incubation, virus inoculum was replaced with  
716 cell growth media and the clock was set to zero hours. We extracted and sequenced poly-A  
717 enriched RNA at 0, 1, 2, 3, 6 and 12 hours post infection (hpi). SARS-CoV-2 genome, sub-  
718 genomic RNA and transcripts were detected in infected samples. PCA clustering was performed  
719 on quantified SARS-CoV-2 transcript levels in infected samples across time-points. Axes labels  
720 indicate the proportion of between-samples variance explained by the first two principal  
721 components. H, hours post infection.

722

723

724

725

726



727  
728

729 **Figure S2. Host-cell transcripts clustering.** To determine gene expression in human cells using  
730 RNA-seq, we infected human lung epithelial cells (Calu-3) at a multiplicity of infection (MOI)  
731 of 2. One hour post incubation, virus inoculum was replaced with cell growth media and the  
732 clock was set to zero hours. We extracted and sequenced poly-A enriched RNA at 0, 1, 2, 3, 6  
733 and 12 hours post infection (hpi). PCA clustering was performed on quantified and filtered host  
734 gene transcripts in both SARS-CoV-2 infected (blue) and mock infected (red) samples across  
735 time-points (indicated in text for each data-point). Axes labels indicate the proportion of  
736 between-samples variance explained by the first two principal components. H, hours post  
737 infection; Mock, mock infected; INF, SARS-CoV-2 infected.  
738



739

740

741 **Figure S3. Virus-host correlated transcriptional profiles.** Host gene expression that correlated

742 with one or more viral transcripts over the course of infection are shown as z-score normalized

743 expression (bottom), along with viral transcripts (top). Top 100 strongly-correlated genes are

744 represented here. H, hour.

745

746

747

748

749

750

751

752



753  
754  
755  
756  
757  
758  
759  
760  
761  
762  
763  
764  
765  
766  
767  
768  
769  
770  
771  
772  
773  
774  
775

**Figure S4. Cytokine signaling in immune system (REAC:R-HSA-1280215).** (A) Pathway schematic of REACTOME cytokine signalling pathway involving interferon alpha/beta/gamma signalling, and OAS antiviral response mediated by interferon stimulated genes. (B) Heatmap of genes within REACTOME cytokine signalling pathway and their log<sub>2</sub> transformed fold-change (FC) between SARS-CoV-2 infected and mock infected samples across all timepoints (0, 1, 2, 3, 6, 12 hrs). H, hours.





776  
 777 **Figure S5. Top functional enrichments over time.** Top significantly (adjusted  $p < 0.05$ )  
 778 enriched ActivePathway GO terms and REACTOME enrichments for infection vs. mock at 1, 2,  
 779 3 and 12 hrs post infection with SARS-CoV-2. Orange bars represent enriched terms associated  
 780 with genes upregulated in infection vs. mock. Blue bars represent enriched terms associated with  
 781 genes downregulated in infection vs. mock. 0 and 6 hr time points were omitted due to lack of  
 782 sufficient numbers of differentially expressed genes.

783  
 784  
 785  
 786  
 787  
 788  
 789  
 790  
 791  
 792  
 793



794

795

796 **Figure S6. Infection-responsive gene expression profiles for ISGs.** ISGs with significantly  
797 different levels of transcript expression between mock (blue) and SARS-CoV-2 infected (red)  
798 samples at 12 hpi are shown. Normalized read counts per gene, across six time-points are  
799 represented here. Time indicated is in hours. Mock, mock infected; INF, SARS-CoV-2 infected.

800

801

802



803  
804

805 **Figure S7. Recombinant human IFN $\beta$ 1 inhibits VSV, HSV and H1N1 replication.** Human  
806 fibroblast (THF) cells were treated with increasing concentrations of recombinant human IFN $\beta$ 1  
807 or mock treated with GFP containing media (control) for 6 hrs. Cells were then infected with  
808 vesicular stomatitis virus (VSV-GFP), herpes simplex virus (HSV-KOS-GFP) or H1N1  
809 influenza virus (H1N1-mNeon). VSV and HSV were engineered to express green fluorescent  
810 protein (GFP). H1N1 expressed mNeon that is detectable in the same wavelength as GFP.  
811 Nineteen hours post infection, GFP/mNeon levels were measured in mock infected and virus  
812 infected cells as a surrogate for virus replication. **(A)** VSV-GFP replication in THF cells treated  
813 or mock treated with IFN $\beta$ 1, normalized to mock infection (Mean $\pm$ SD; n=3). **(B)** HSV-KOS-  
814 GFP replication in THF cells treated or mock treated with IFN $\beta$ 1, normalized to mock infection  
815 (Mean $\pm$ SD; n=3). **(C)** H1N1-mNeon replication in THF cells treated or mock treated with  
816 IFN $\beta$ 1, normalized to mock infection (Mean $\pm$ SD; n=3).

817  
818

819
